# Supplementary material for: Tau burden and the functional connectome in Alzheimer’s disease and progressive supranuclear palsy
Source: PubMed Central journal article supplement (PMC5837359; doi:10.1093/brain/awx347), 2018-01-05

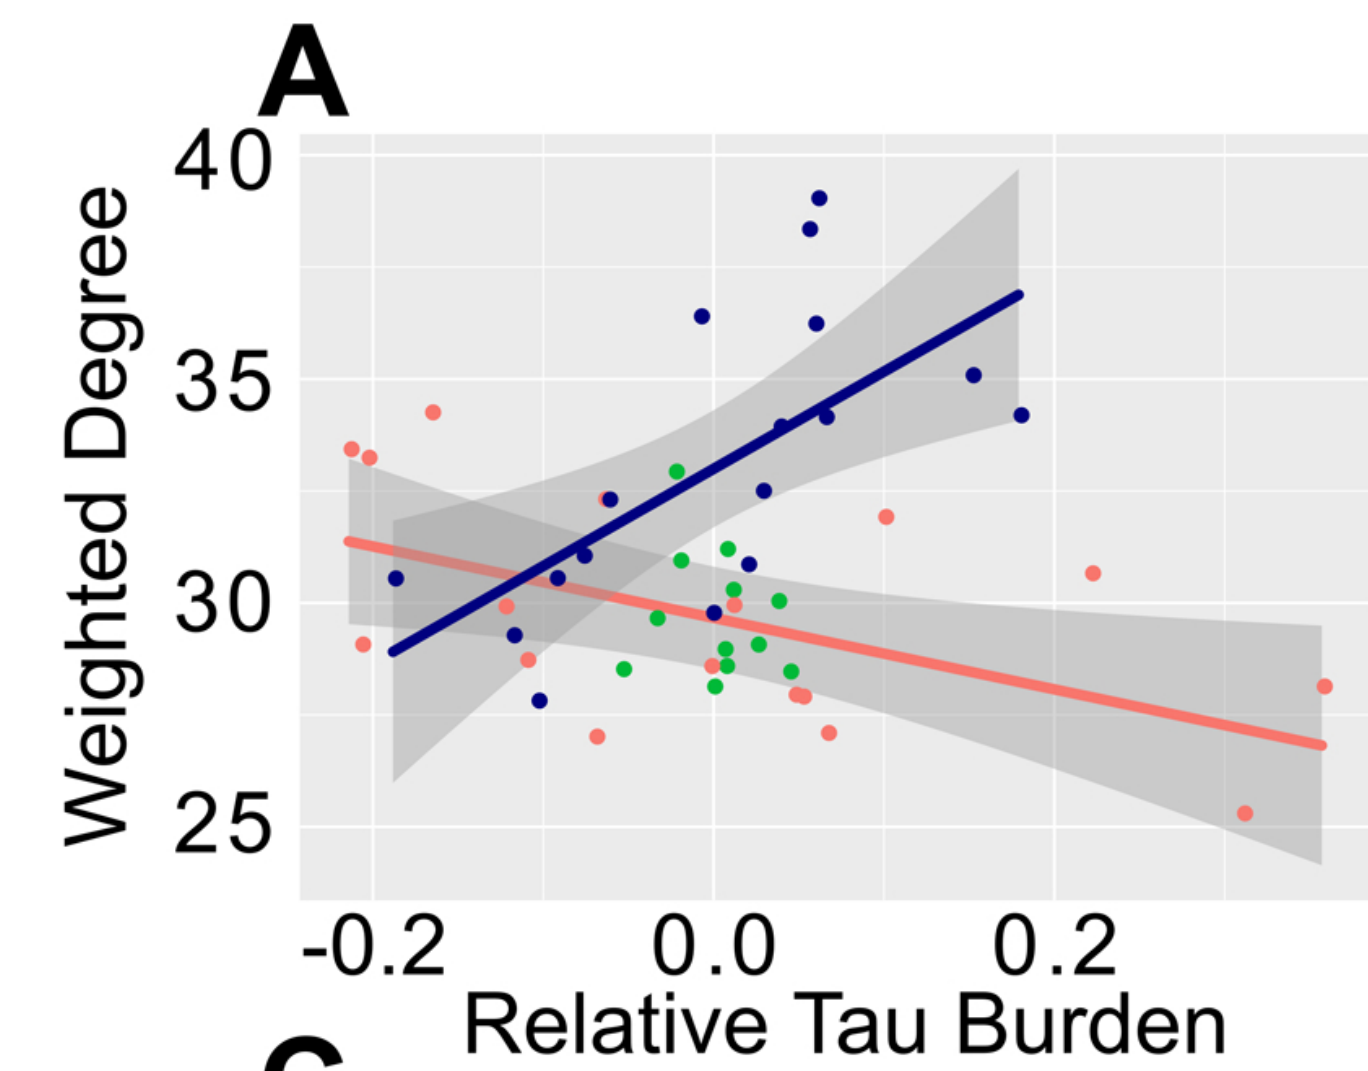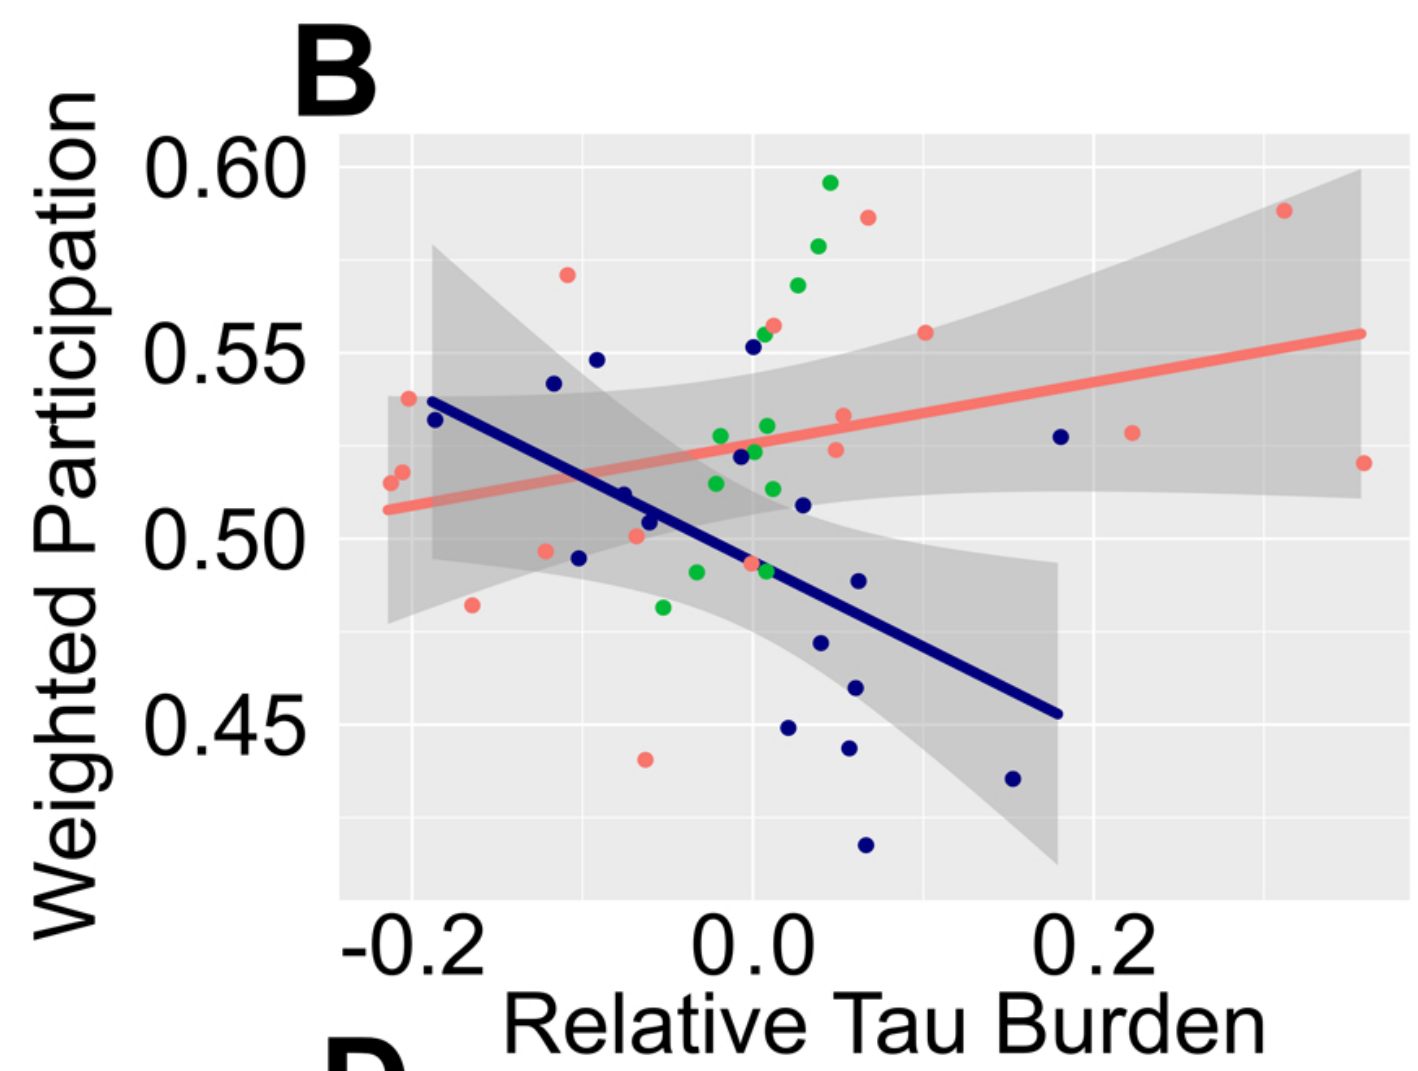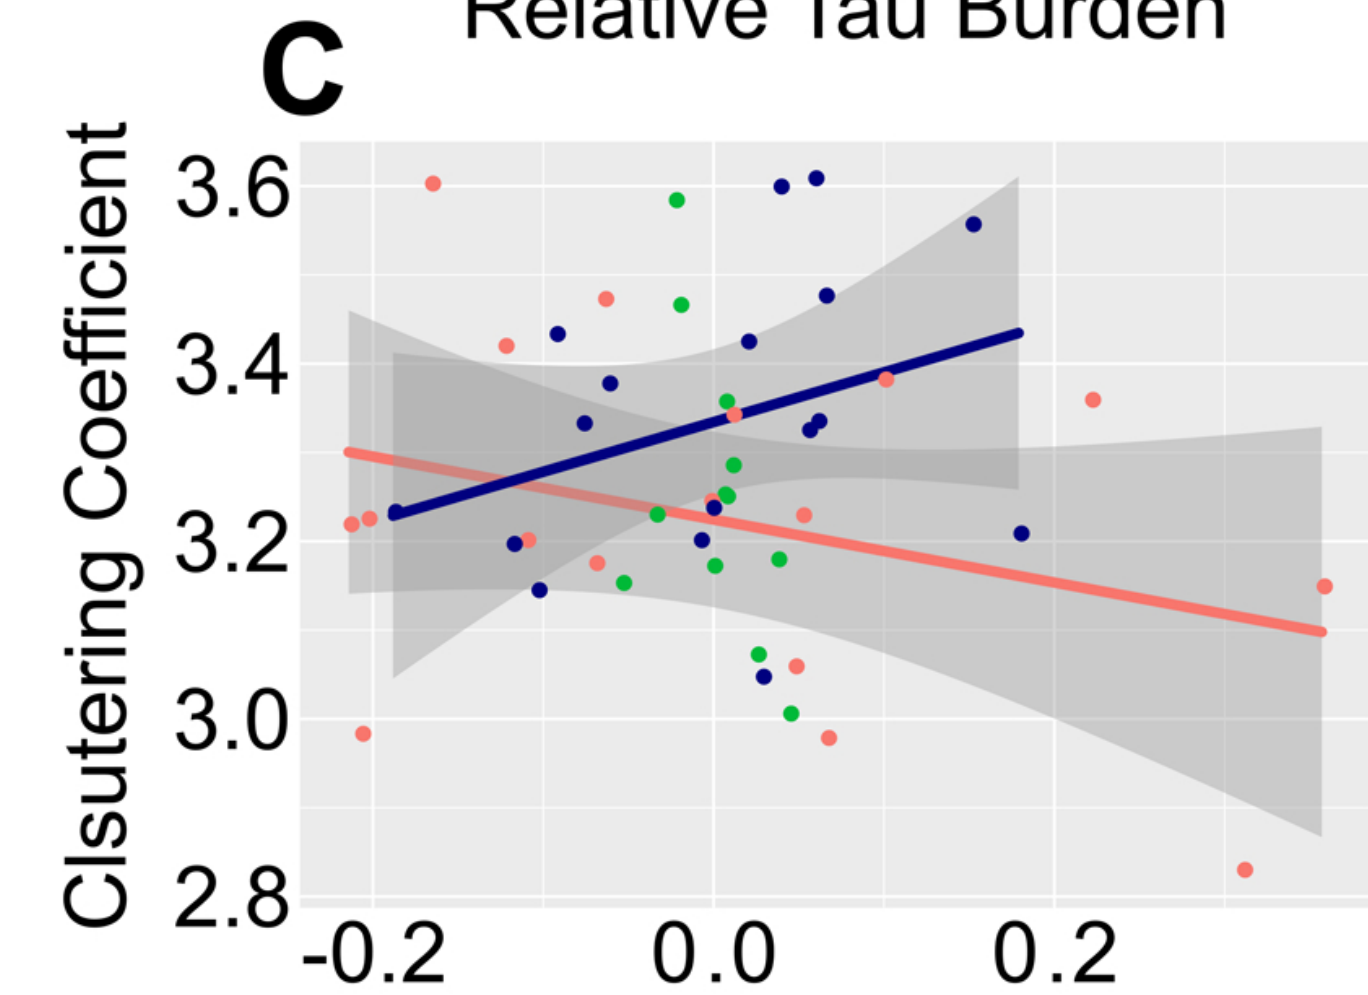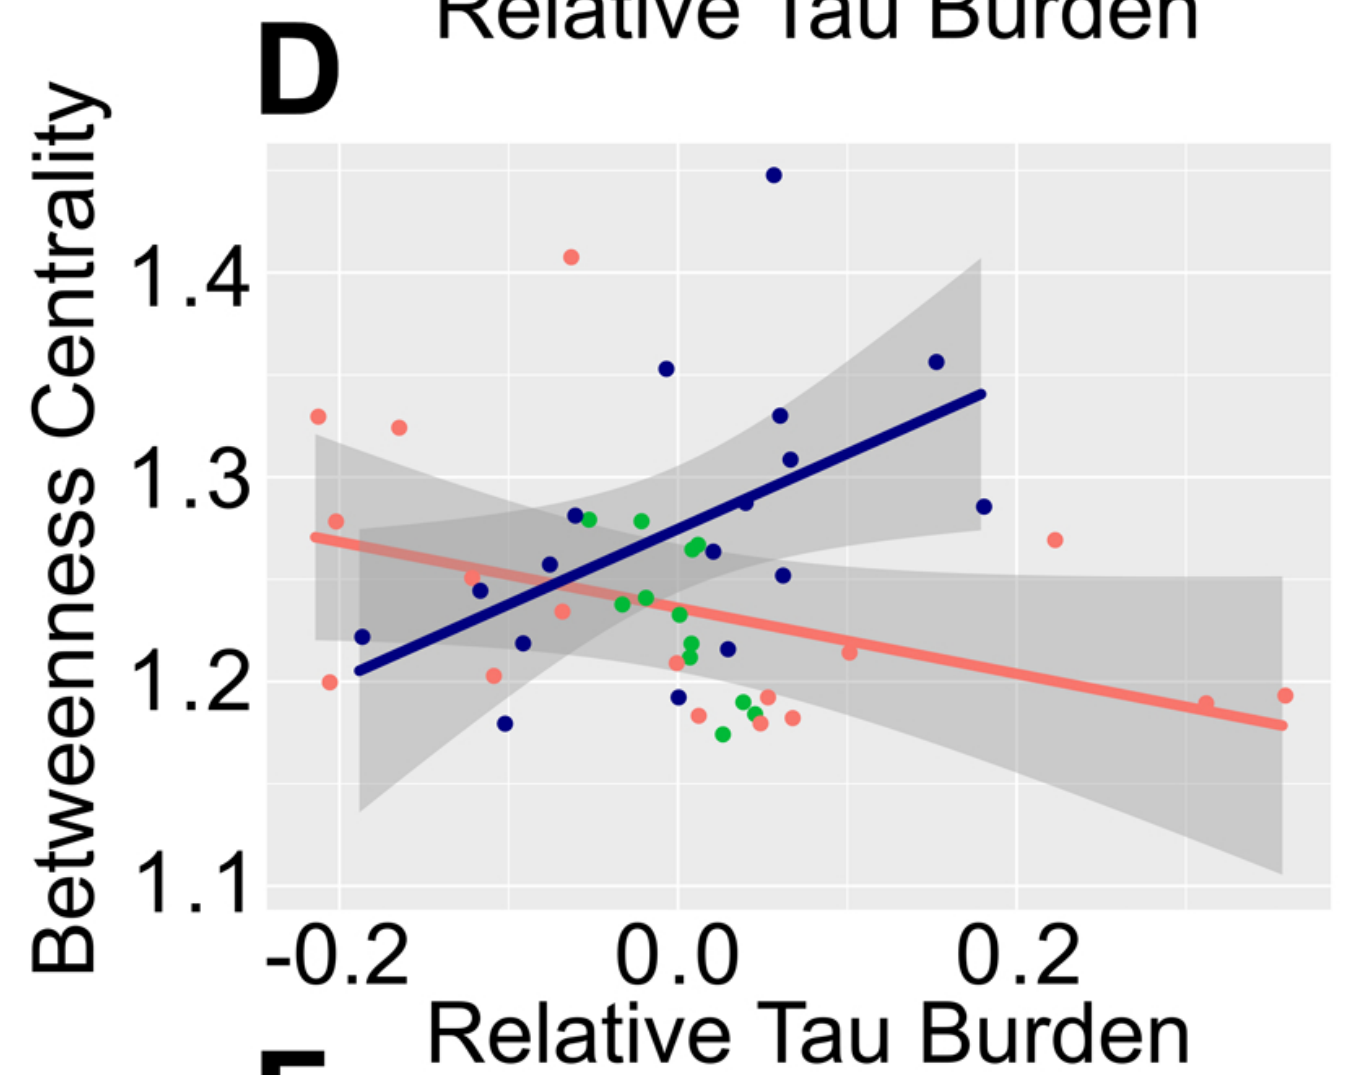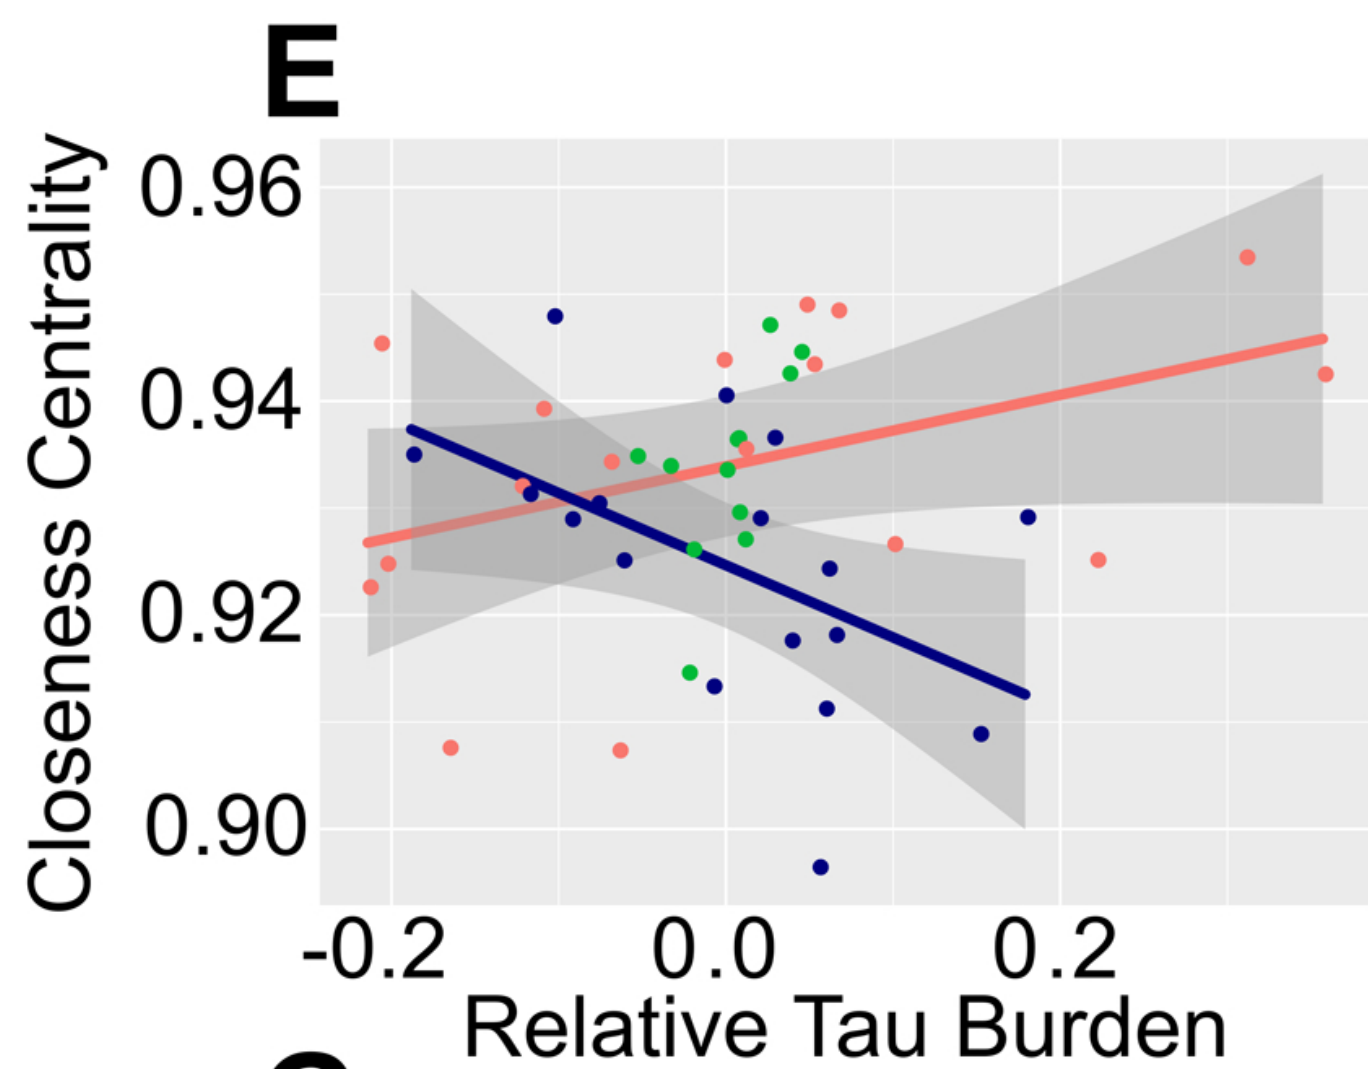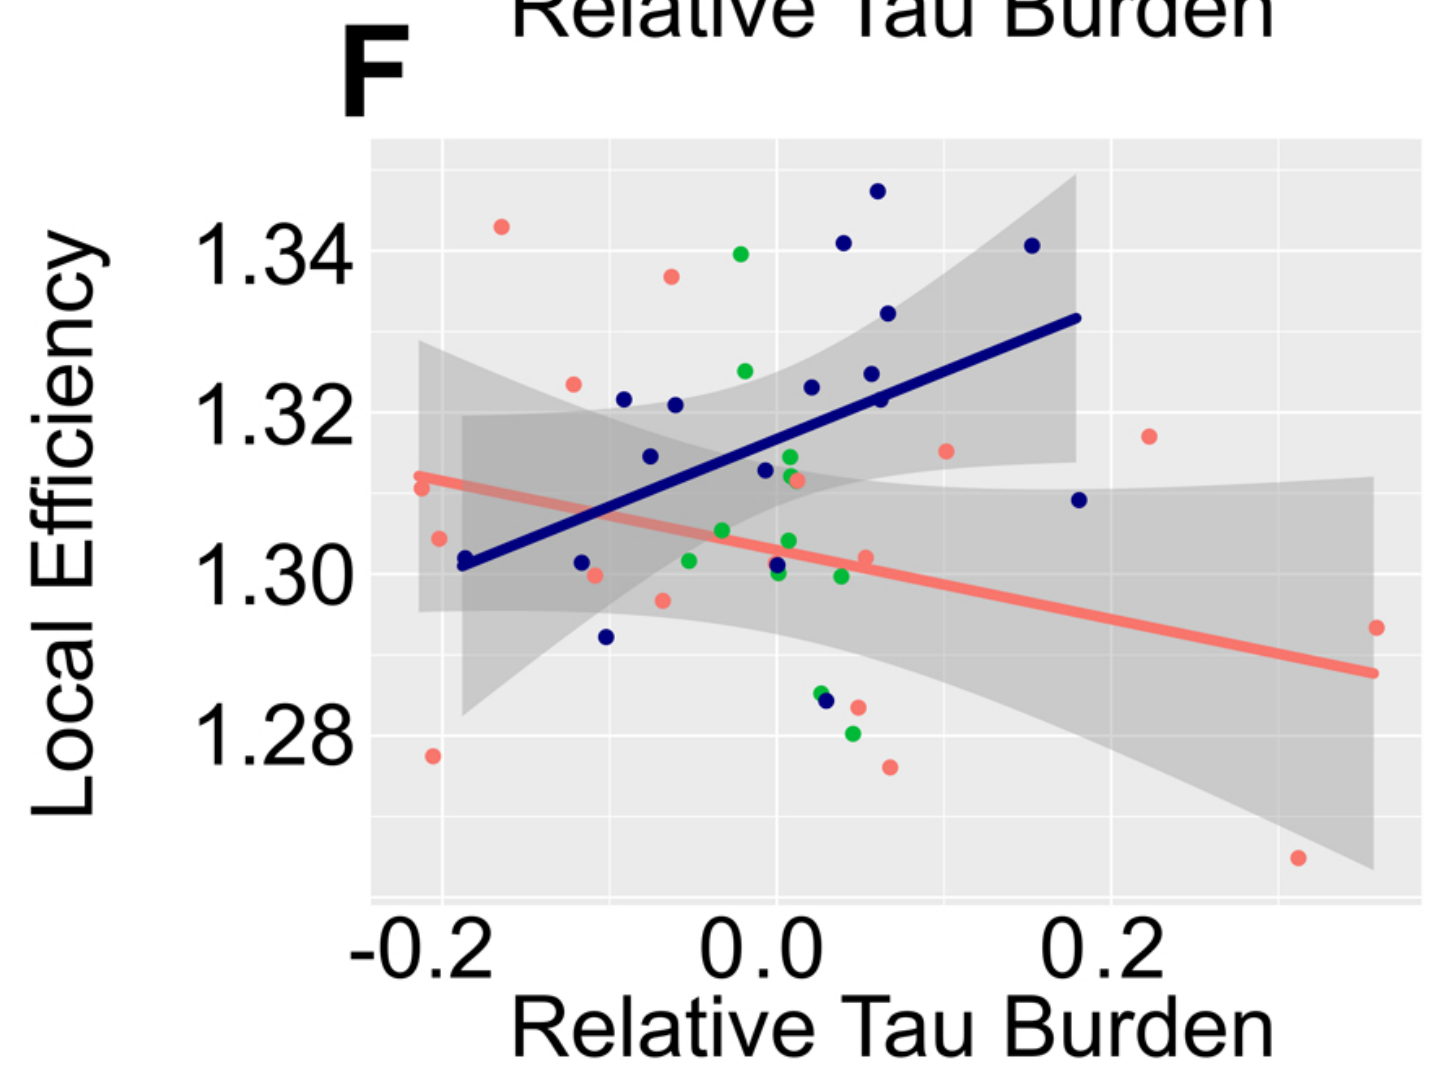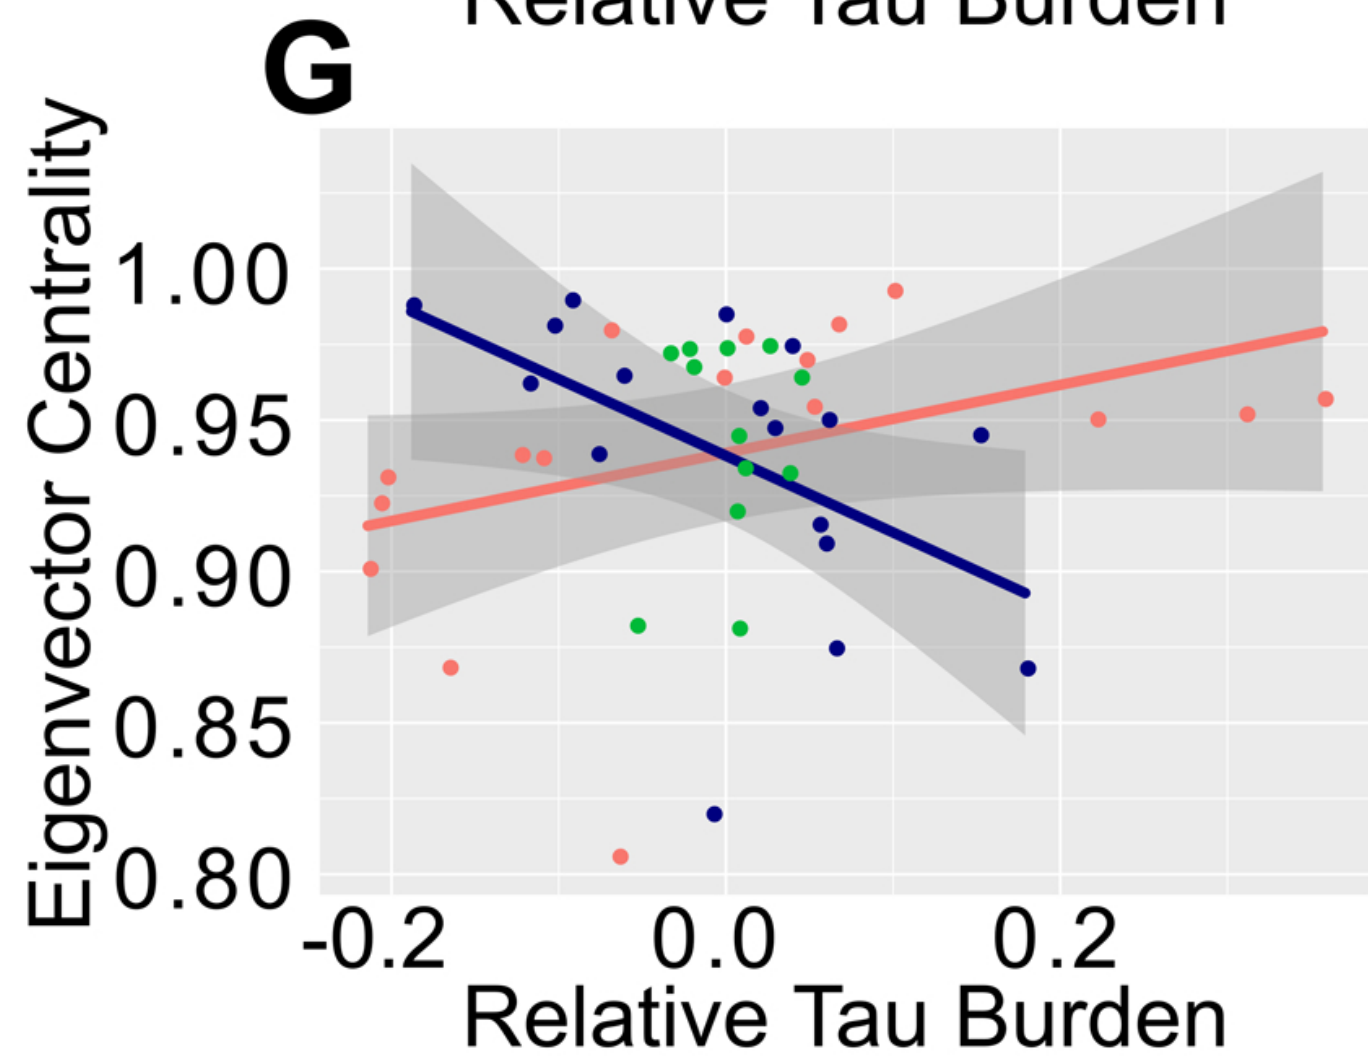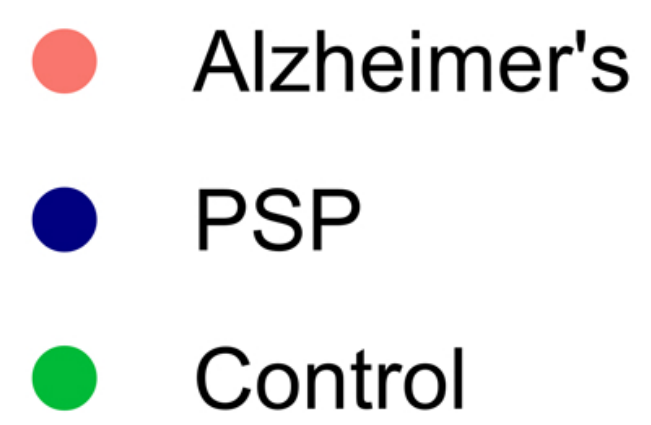

Supplement: brain-2017-01363-file011_awx347.pdf [file brain-2017-01363-file011_awx347.pdf]
